# Supplementary material for: Hypoxia-induced Long Non-coding RNA LSAMP-AS1 Regulates ceRNA Network to Predict Prognosis for Pancreatic Cancer
Source: Research Square preprint supplement (doi:10.21203/rs.3.rs-1356897/v1), 2022-03-01
Supplement: Supplementary file 1 [file f6d7eda24b8356c264f318af.docx]

**Supplementary Material**


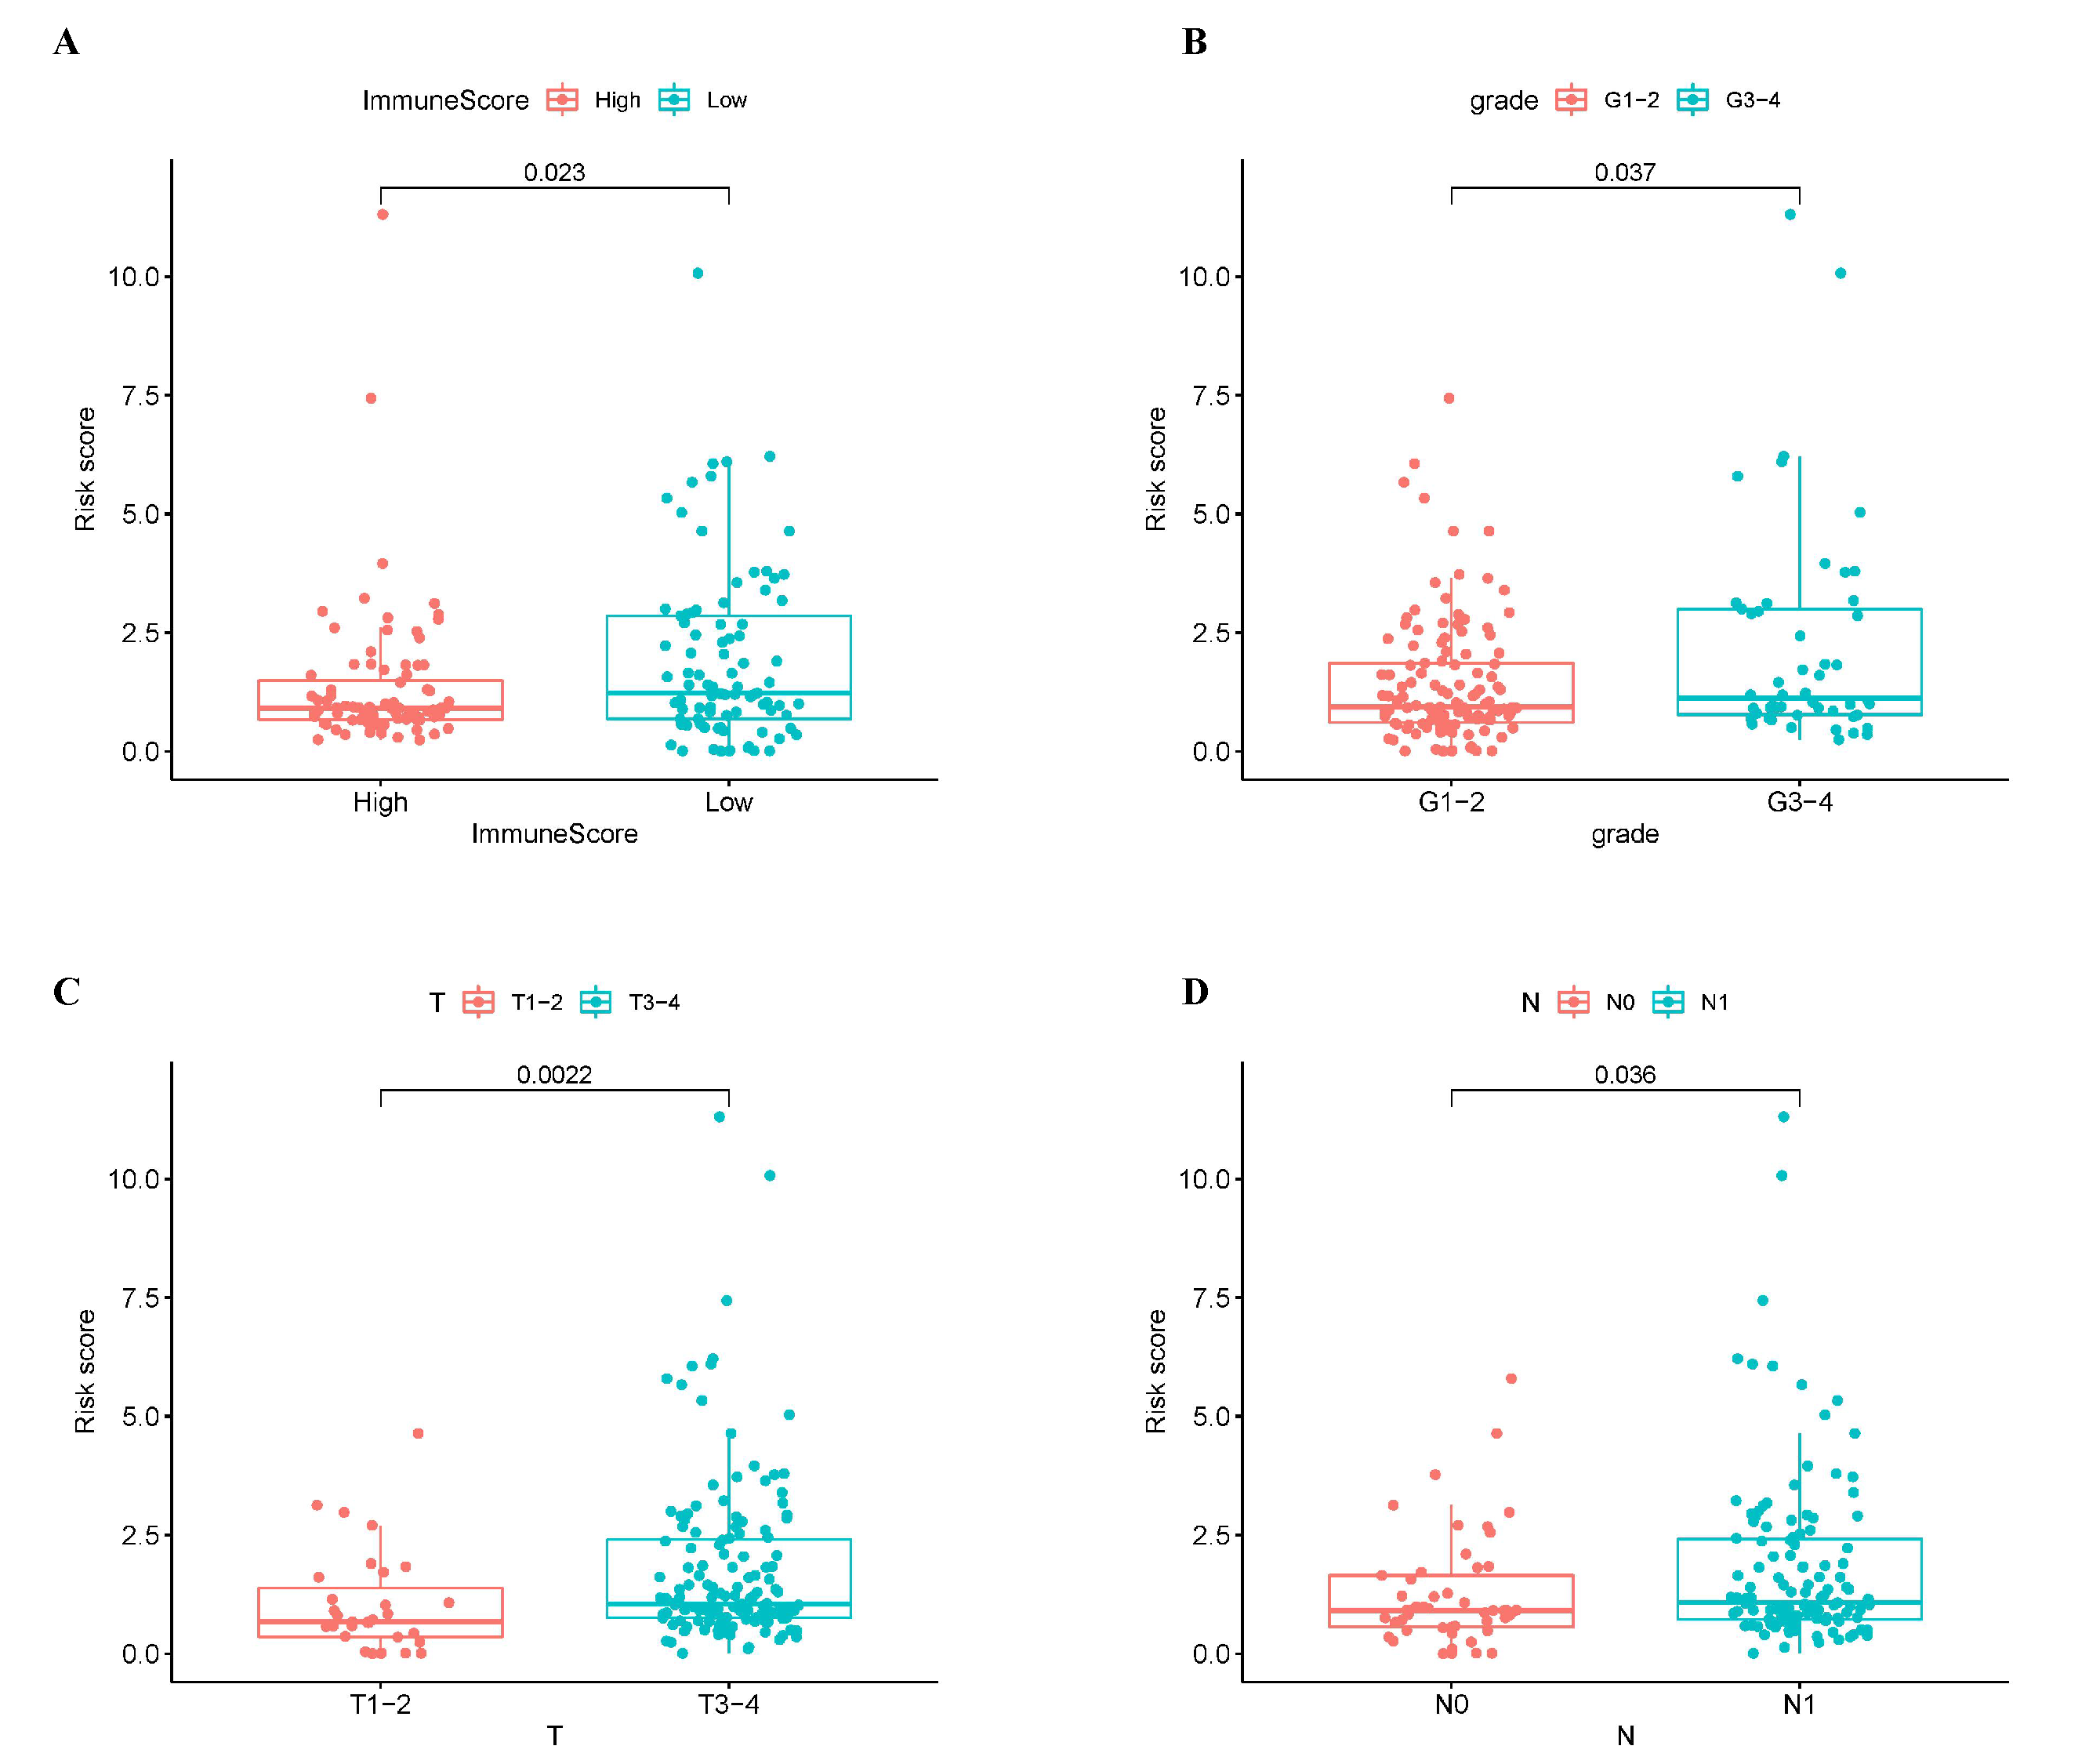


**Supplementary Figure 1.** The differences of risk scores in immune score (A), pathologic_grade (B), pathologic_T (C) and pathologic_N (D).

**
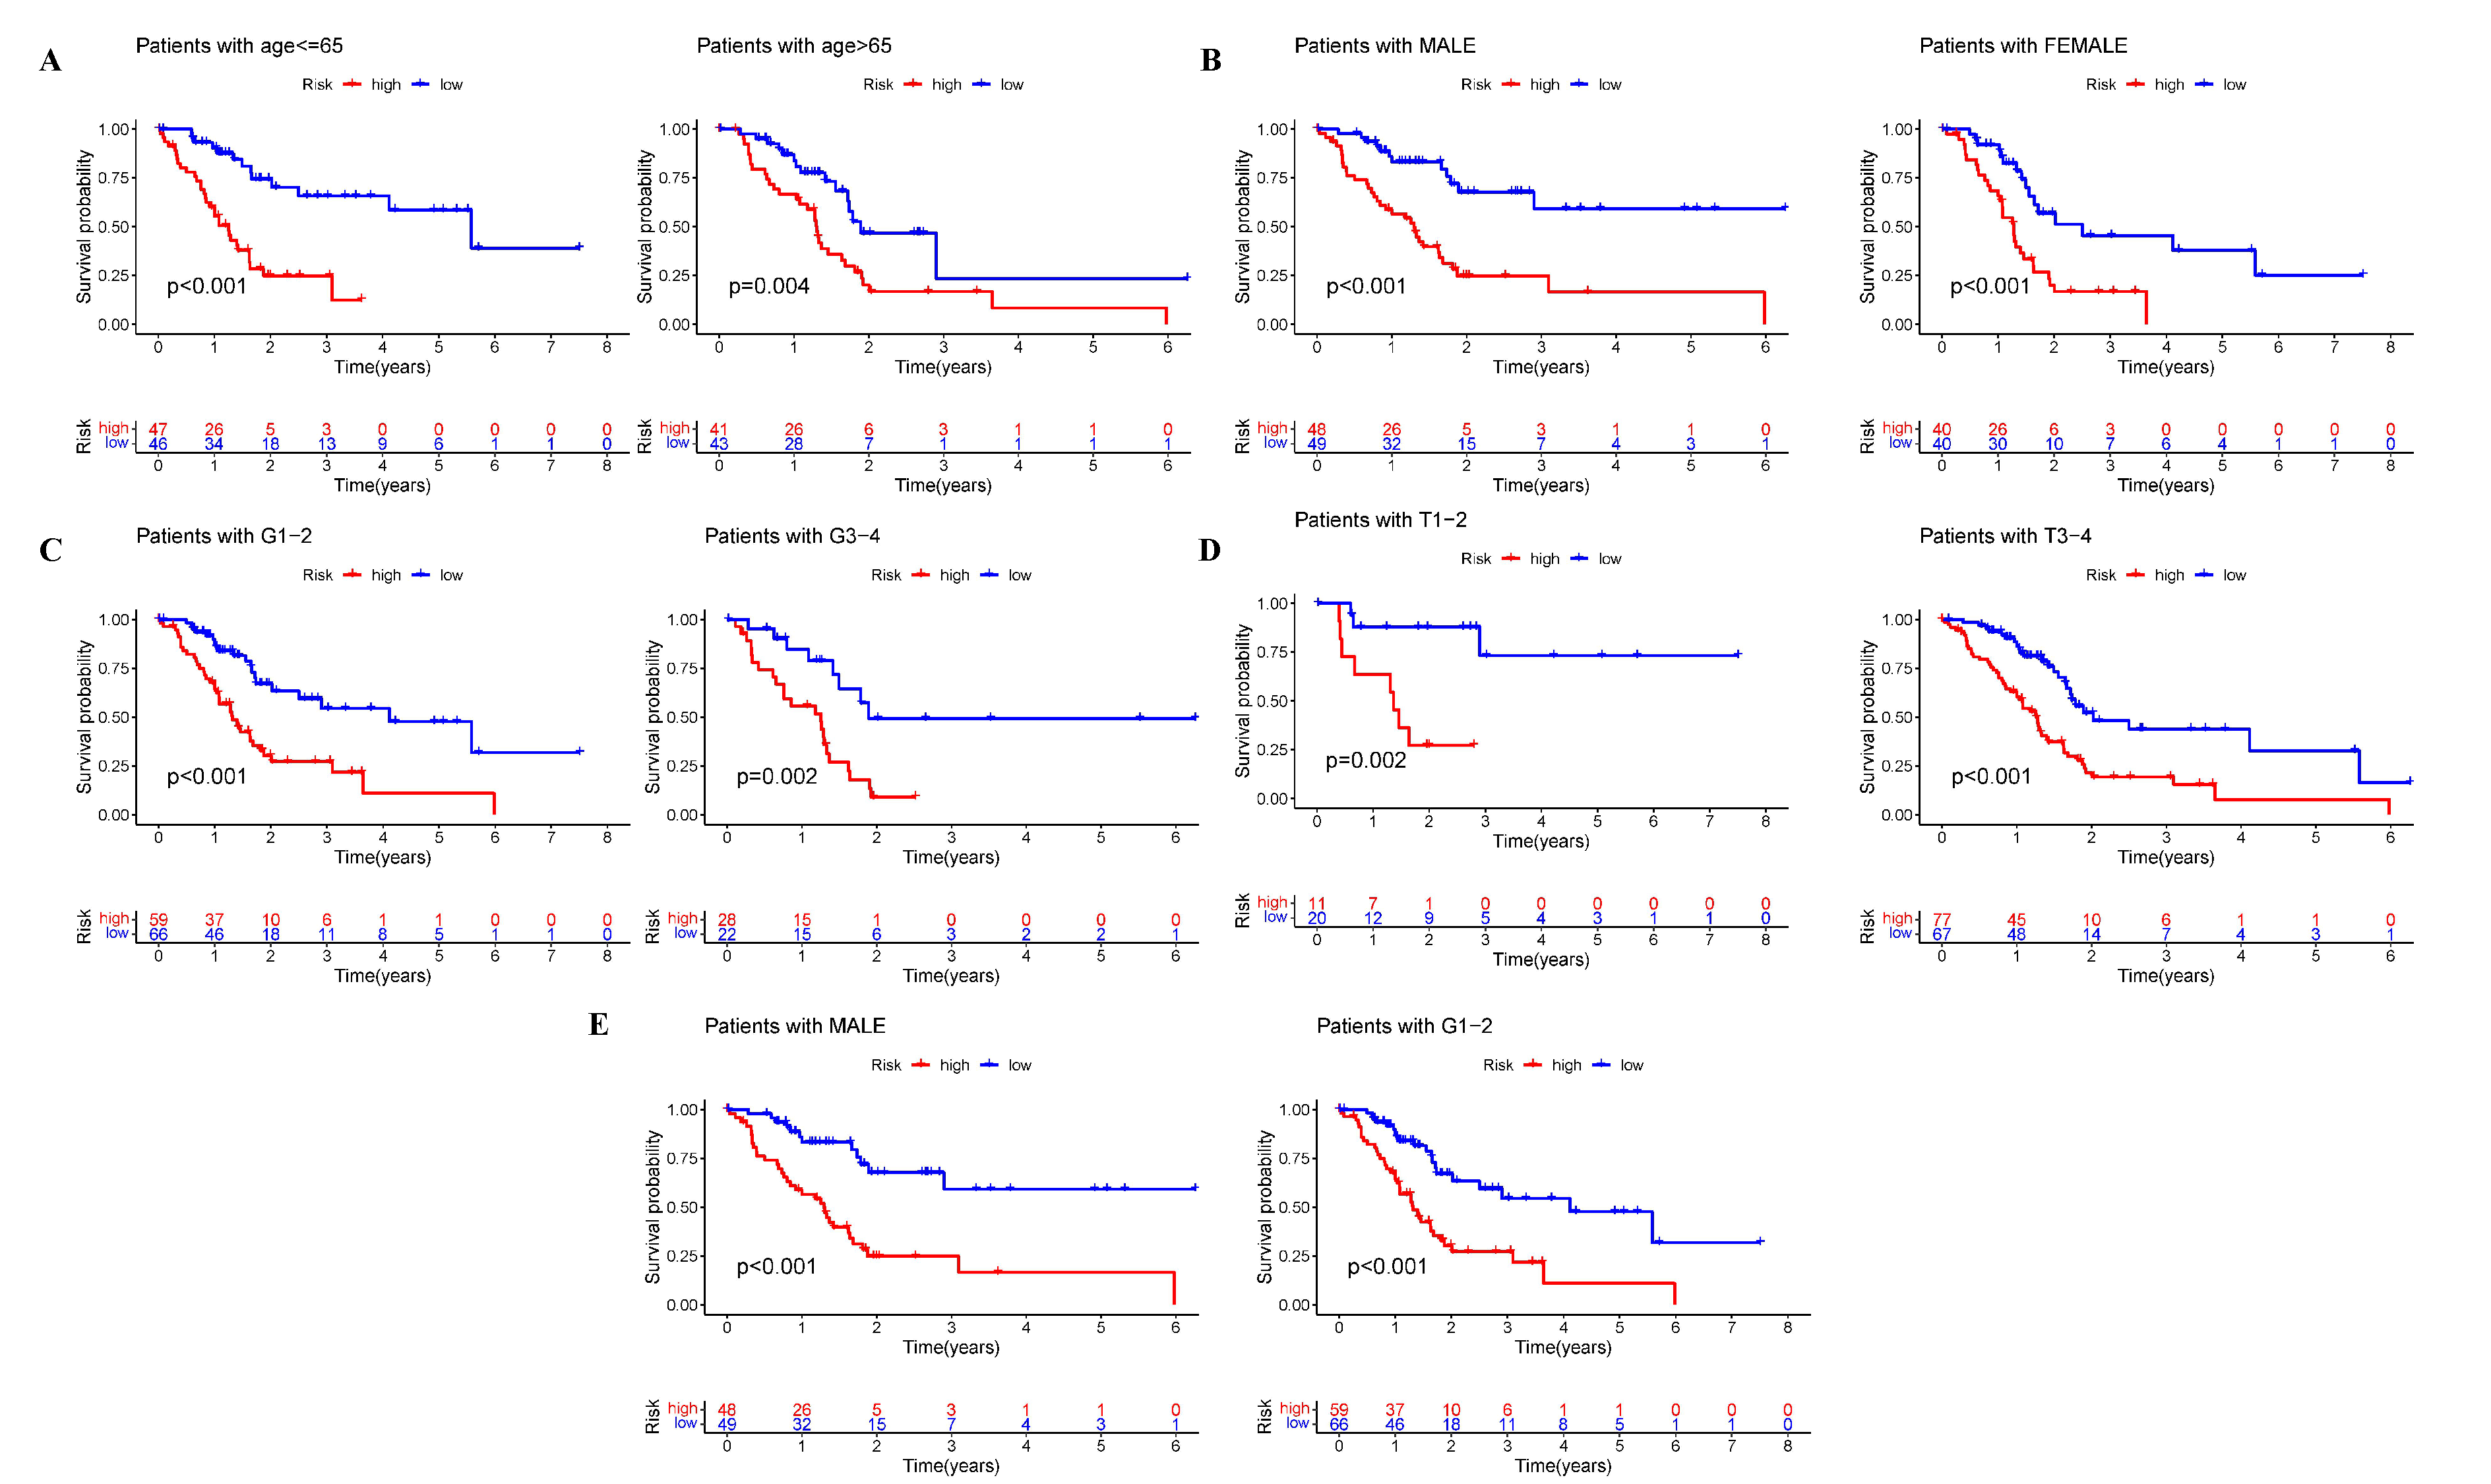
**

**Supplementary Figure 2.** The survival analysis of risk model in different ages **(A)**, genders **(B)**, grades **(C)**, T stage **(D)** and N stage **(E)**.
